# Supplementary material for: Functional evaluation of therapeutic response of HCC827 lung cancer to bevacizumab and erlotinib targeted therapy using dynamic contrast-enhanced and diffusion-weighted MRI
Source: PubMed Central journal article supplement (PMC5679602; doi:10.1371/journal.pone.0187824), 2017-11-09

**Tumor growth of PC9 xenografts with low-dose EGFR TKI + BEV therapy.** Mice bearing PC9 xenografts were treated 10 mg/kg of gefitinib or gefitinib (10 mg/kg) +BEV (5 mg/kg), n=4-5. Data are presented as the mean  $\pm$  SD from week 0 (baseline) to week 2. \*p < 0.05

S1 Fig

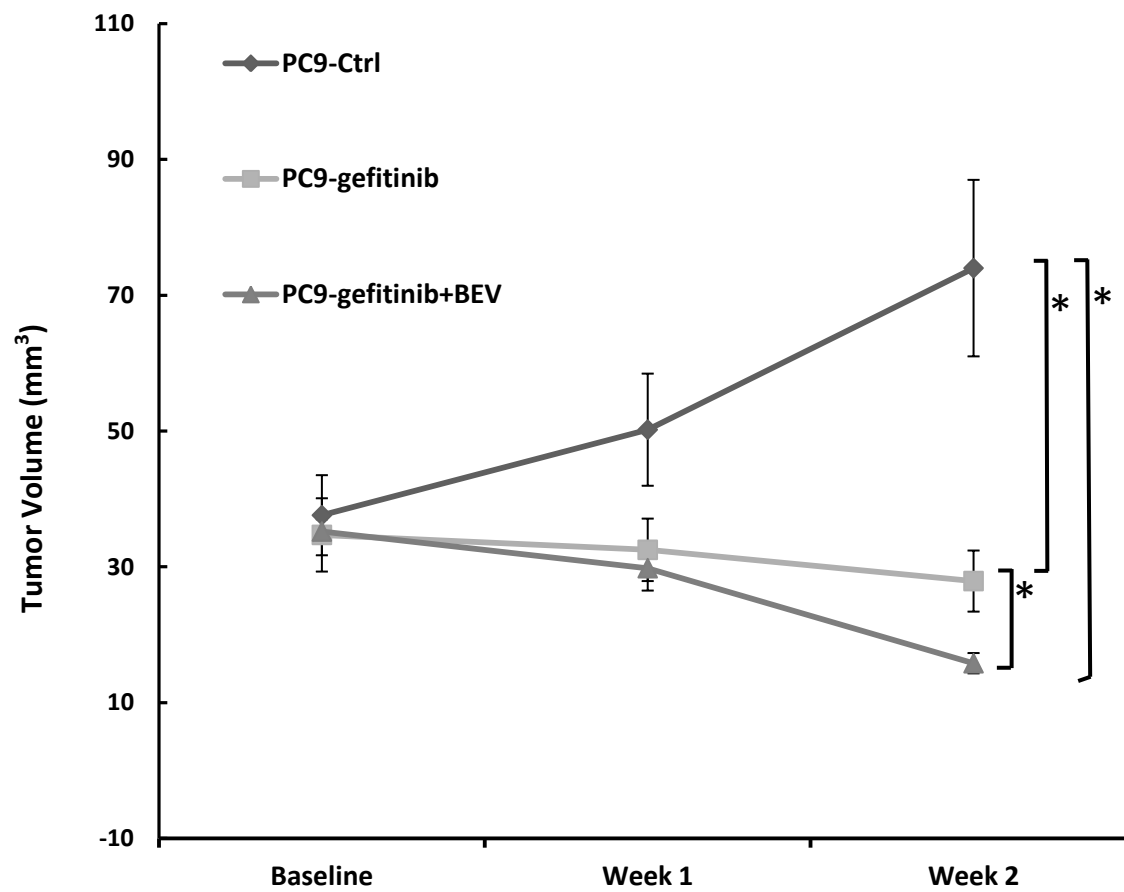

Supplement: pone.0187824.s001.pdf [file pone.0187824.s001.pdf]
