# Supplementary material for: Functional evaluation of therapeutic response of HCC827 lung cancer to bevacizumab and erlotinib targeted therapy using dynamic contrast-enhanced and diffusion-weighted MRI
Source: PubMed Central journal article supplement (PMC5679602; doi:10.1371/journal.pone.0187824), 2017-11-09

**Plots of relative changes and color maps of DCE parameters for each group in PC9 xenografts.** The parameters: (A) and (C)  $K^{trans}$ , (B) and (D)  $iAUC_{90}$  are shown from week 0 (baseline) to week 2. Data are presented as the mean  $\pm$  SD, \*p < 0.05

# S2 Fig

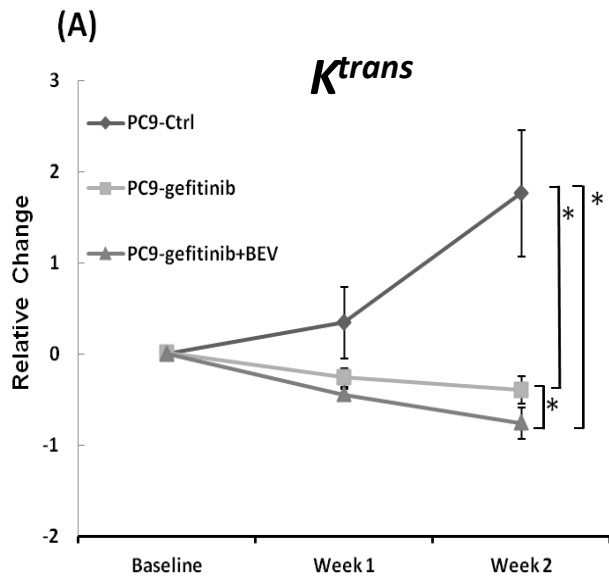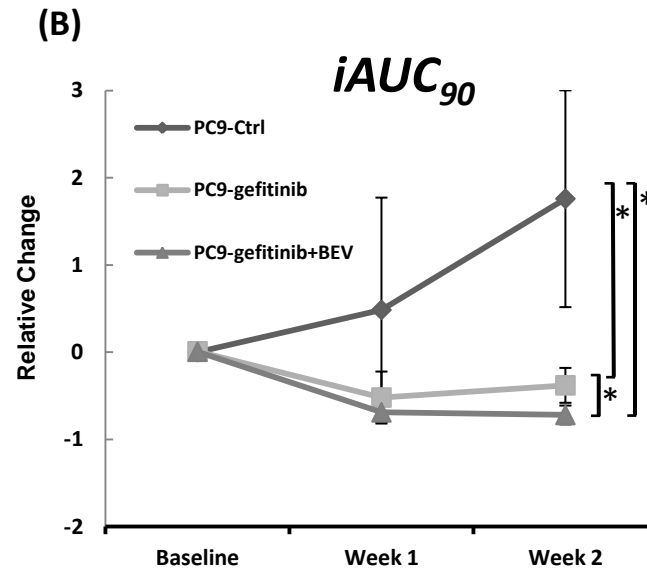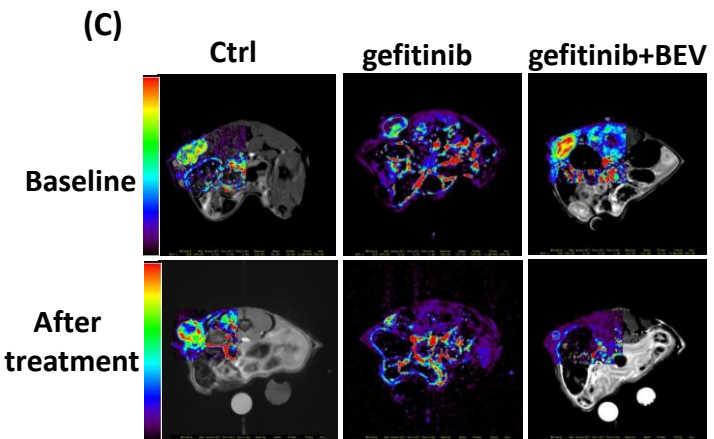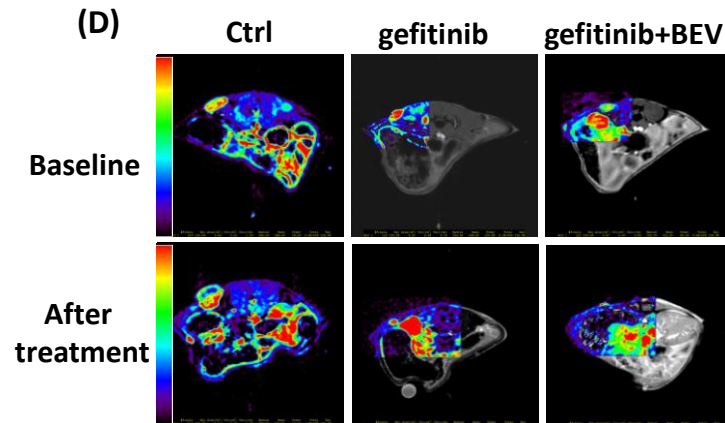

Supplement: pone.0187824.s002.pdf [file pone.0187824.s002.pdf]
