# Supplementary material for: Functional evaluation of therapeutic response of HCC827 lung cancer to bevacizumab and erlotinib targeted therapy using dynamic contrast-enhanced and diffusion-weighted MRI
Source: PubMed Central journal article supplement (PMC5679602; doi:10.1371/journal.pone.0187824), 2017-11-09

## **Histological staining of tumor vessels in PC9 mice tissues.**

(A) Representative immunohistochemical images of CD31-immunostaining for each group (100X). (B) MVD in tumor tissue was counted in three randomly chosen. Columns, mean; Bars, SD.

(A)

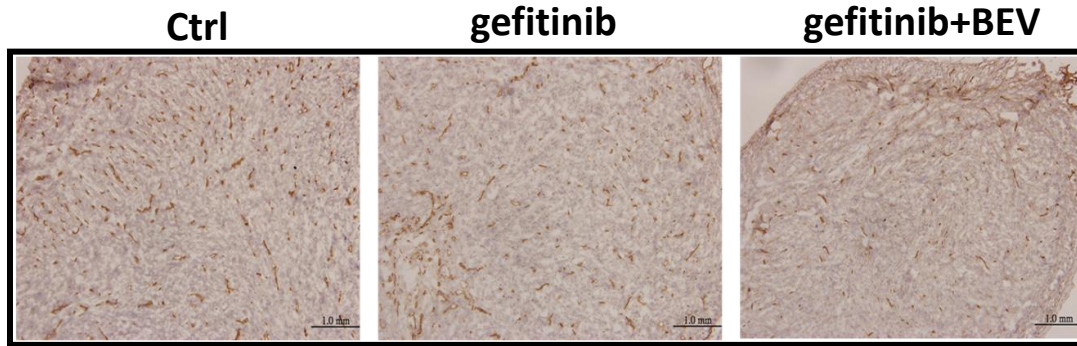

(B)

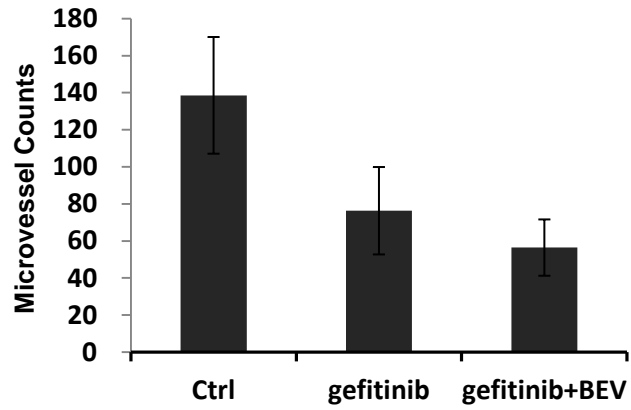

Supplement: pone.0187824.s004.pdf [file pone.0187824.s004.pdf]
